# Supplementary material for: Positively charged GdIIIcryptates: slow, associative water exchange
Source: Royal Society of Chemistry journal article supplement (doi:10.1039/b506700f), 2005-10-31

## Positively Charged Gd<sup>III</sup> Cryptates : Slow, Associative Water Exchange

László Burai<sup>a</sup>, Éva Tóth<sup>a</sup>, Hervé Bazin<sup>b</sup>, Meriem Benmelouka<sup>a</sup>, Zoltán Jászberényi,<sup>a</sup> Lothar Helm<sup>a</sup>  
and André E. Merbach<sup>a\*</sup>

<sup>a</sup> *Laboratoire de Chimie Inorganique et Bioinorganique, Ecole Polytechnique Fédérale de Lausanne, ISIC, BCH, CH-1015 Lausanne, Switzerland. Fax: 41 21 693 9875; Tel: 41 21 693 9871, E-mail: [andre.merbach@epfl.ch](mailto:andre.merbach@epfl.ch)*

<sup>b</sup> *CIS bio international, BP 84175-30204 Bagnols sur Cèze, France*

## Equations:

**EPR spectroscopy:** Electron-spin relaxation of  $S=7/2$  – ions is dominated by zero-field-splitting (ZFS) interaction. In the general case the relaxation is multi-exponential and can therefore not be described by single relaxation rates  $1/T_{1e}$  and  $1/T_{2e}$ . Rast, Fries and Borel developed a description of electronic relaxation of paramagnetic metal ion complexes which takes the static zero field splitting into account [a) S. Rast, A. Borel, L. Helm, E. Belorizky, P. H. Fries, A. E. Merbach, *J. Am. Chem. Soc.* **2001**, *123*, 2637; b) S. Rast, P. H. Fries, E. Belorizky, A. Borel, L. Helm, A. E. Merbach, *J. Chem. Phys.* **2001**, *115*, 7554.]. This description allows calculation of the derivative of the ESR lineshape and therefore its peak-to-peak width  $\Delta H_{pp}$  which is measured experimentally. The static ZFS has three components for order 2, 4 and 6 and therefore three parameters  $a_2$ ,  $a_4$ , and  $a_6$  have to be adjusted. The dynamic ZFS is described by the  $a_{2T}$  parameter. It has been shown that the longitudinal relaxation of the electron spin can be adequately described by a single relaxation time  $T_{1e}$ . To describe the transverse relaxation of the electron spin magnetization four correlation functions with four characteristic times  $T_{2ek}$  and different intensities  $I_k$  have to be used.

$$g_e(t) = \sum_{k=1}^4 I_k \exp\{-t/T_{2ek}\}$$

**$^{17}\text{O}$  NMR spectroscopy:** The  $^{17}\text{O}$  NMR measurements provide the relaxation rates and angular frequencies of the paramagnetic solutions,  $1/T_1$ ,  $1/T_2$  and  $\omega$ , and of the acidified water reference,  $1/T_{1A}$ ,  $1/T_{2A}$  and  $\omega_A$ . This allows the calculation of the reduced relaxation rates and chemical shift,  $1/T_{1r}$ ,  $1/T_{2r}$  and  $\Delta\omega_r$ .

The parameters  $1/T_{1m}$  and  $1/T_{2m}$  are the relaxation rates of the bound water and  $\Delta\omega_m$  is the chemical shift difference between bound and bulk water in absence of exchange. The term  $\tau_m$  is the mean residence time or the inverse of the water exchange rate,  $k_{ex}$ , and  $P_m$  is the mole fraction of the bound water.

$$\frac{1}{T_{1r}} = \frac{1}{P_m} \left[ \frac{1}{T_1} - \frac{1}{T_{1A}} \right] = \frac{1}{T_{1m} + \tau_m} + \frac{1}{T_{1os}}$$

$$\frac{1}{T_{2r}} = \frac{1}{P_m} \left[ \frac{1}{T_2} - \frac{1}{T_{2A}} \right] = \frac{1}{\tau_m} \frac{T_{2m}^{-2} + \tau_m^{-1} T_{2m}^{-1} + \Delta\omega_m^2}{(\tau_m^{-1} + T_{2m}^{-1}) + \Delta\omega_m^2}$$

$$\Delta\omega_r = \frac{1}{P_m} (\omega - \omega_A) = \frac{\Delta\omega_m}{(1 + \tau_m T_{2m}^{-1})^2 + \Delta\omega_m^2} + \Delta\omega_{os}$$

Outer-sphere contributions to  $^{17}\text{O}$  relaxation can in general be neglected for  $\text{Gd}^{3+}$  complexes. The temperature dependence of the water exchange rate is described by the Eyring equation where  $\Delta S^\ddagger$  and  $\Delta H^\ddagger$  are the entropy and enthalpy of activation for the water exchange process, and  $k_{ex}^{298}$  is the water exchange rate at 298.15 K.

$$\frac{1}{\tau_m} = k_{ex} = \frac{k_B T}{h} \exp \left\{ \frac{\Delta S^\ddagger}{R} - \frac{\Delta H^\ddagger}{RT} \right\} = \frac{k_{ex}^{298} T}{298.15} \exp \left\{ \frac{\Delta H^\ddagger}{R} \left( \frac{1}{298.15} - \frac{1}{T} \right) \right\}$$

The  $^{17}\text{O}$  transverse relaxation rates of the bound water,  $1/T_{2m}$ , are governed by scalar relaxation mechanism  $1/T_{2sc}$  with  $A/\hbar$  as the scalar coupling constant.

$$\frac{1}{\tau_{1s}} = \frac{1}{\tau_m} + \frac{1}{T_{1e}}; \quad \frac{1}{\tau_{2sk}} = \frac{1}{\tau_m} + \frac{1}{T_{2ek}};$$

$$\frac{1}{T_{2sc}} = \left( \frac{A}{\hbar} \right)^2 \frac{S(S+1)}{3} \left[ \tau_{1s} + \sum_{k=1}^4 I_k \frac{\tau_{2sk}}{1 + \omega^2 \tau_{2sk}^2} \right]$$

The  $^{17}\text{O}$  longitudinal relaxation rates of the bound water,  $1/T_{1m}$ , are the sum of dipolar and quadrupolar (in the approximation developed by Halle) contributions:  $\gamma_S$  and  $\gamma_I$  are the electron and nuclear gyromagnetic ratios, respectively ( $\gamma_S = 1.76 \times 10^{11} \text{ rad s}^{-1}\text{T}^{-1}$ ,  $\gamma_I = -3.626 \times 10^7 \text{ rad s}^{-1}\text{T}^{-1}$ ),  $r_{GdO}$  is the effective distance between the  $\text{Gd}^{\text{III}}$ -electron spin and the  $^{17}\text{O}$  nucleus,  $I$  is the nuclear spin ( $5/2$  for  $^{17}\text{O}$ ),  $\chi$  is the quadrupolar coupling constant and  $\eta$  is an asymmetry parameter.

$$\frac{1}{T_{1m}} = \frac{1}{T_{1dd}} + \frac{1}{T_{1q}}$$

$$\frac{1}{\tau_{1d}} = \frac{1}{\tau_m} + \frac{1}{\tau_R} + \frac{1}{T_{1e}}; \quad \frac{1}{\tau_{2d}} = \frac{1}{\tau_m} + \frac{1}{\tau_R} + \frac{1}{T_{2ek}}$$

$$\frac{1}{T_{1dd}} = \frac{2}{15} \left( \frac{\mu_0}{4\pi} \right)^2 \frac{\hbar^2 \gamma_I^2 \gamma_S^2}{r_{GdO}^6} S(S+1) \left[ 3J(\omega_I; \tau_{d1}) + 7 \sum_{k=1}^4 I_k J(\omega_S; \tau_{d2k}) \right]; \quad J(\omega, \tau) = \frac{\tau}{1 + \omega^2 \tau^2}$$

$$\frac{1}{T_{1q}} = \frac{3\pi^2}{10} \frac{2I+3}{I^2(2I-1)} \chi^2 (1 + \eta^2/3) [0.2J_1(\omega_I) + 0.8J_2(\omega_I)]; \quad J_n(\omega, \tau) = \frac{\tau}{1 + n^2 \omega^2 \tau^2}$$

The chemical shift of the bound water molecule,  $\Delta\omega_m$ , depends on the hyperfine interaction between the  $\text{Gd}^{\text{III}}$  electron spin and the  $^{17}\text{O}$  nucleus and is directly proportional to the scalar coupling constant,  $A/\hbar$ .

$$\Delta\omega_m = \frac{g_L \mu_B S(S+1)}{3k_B T} \frac{A}{\hbar} B$$

The isotopic Landé  $g$  factor is equal to 2.0 for  $\text{Gd}^{\text{III}}$ ,  $B$  represents the magnetic field, and  $k_B$  is the Boltzmann constant. The outer-sphere contribution to the  $^{17}\text{O}$  chemical shifts is set proportional to  $\Delta\omega_m$ , with  $C_{os}$  is an empirical constant.

$$\Delta\omega_{os} = C_{os} \Delta\omega_m$$

**<sup>1</sup>H NMRD:** The measured longitudinal proton relaxation rate,  $R_1^{obs}$ , is the sum of a paramagnetic,  $R_1^p$ , and a diamagnetic contribution,  $R_1^d$ .  $r_1$  represents the proton relaxivity, normally expressed in  $\text{mM}^{-1} \text{s}^{-1}$ .

$$R_1^{obs} = R_1^d + R_1^p = R_1^d + r_1 [Gd^{3+}]$$

The term  $r_1$  can be decomposed into inner-sphere and outer-sphere contributions.  $q$  is the number of inner sphere water molecules and  $T_{1m}^H$  is the relaxation time of water proton directly bound to  $Gd^{III}$ .

$$r_1 = r_{1is} + r_{1os}$$

$$r_{1is} = \frac{1}{1000} \frac{q}{55.55} \frac{1}{T_{1m}^H + \tau_m}$$

The longitudinal relaxation rate of the inner-sphere protons,  $1/T_{1m}^H$ , is governed by dipolar interaction with the electron spin  $S$ , where  $r_{GdH}$  is the effective distance between the electron charge and the <sup>1</sup>H nucleus.

$$\frac{1}{T_{1m}^H} = \frac{2}{15} \left( \frac{\mu_0}{4\pi} \right)^2 \frac{\hbar^2 \gamma_I^2 \gamma_S^2}{r_{GdH}^6} S(S+1) \left[ 3J(\omega_I; \tau_{d1}) + 7 \sum_{k=1}^4 I_k J(\omega_S; \tau_{d2k}) \right]$$

The outer-sphere contribution is estimated by Freed's model, where  $N_A$  is the Avogadro constant,  $a_{GdH}$  the closest approach distance of the water proton and the  $Gd^{III}$ ,  $D_{GdH}$  is the mutual diffusion of bulk water and the complex, and  $\tau_{GdH}$  is the correlation time for translational diffusion such that  $\tau_{GdH} = a_{GdH}^2 / D_{GdH}$ . The spectral densities,  $J_{os}$ , are from Freed's model.

$$r_{1os} = \frac{32 N_A \pi}{405} \left( \frac{\mu_0}{4\pi} \right)^2 \frac{\hbar^2 \gamma_I^2 \gamma_S^2}{a_{GdH} D_{GdH}} S(S+1) \left[ 3J_{os}(\omega_I; T_{1e}) + 7 \sum_{k=1}^4 I_k J_{os}(\omega_S; T_{2ek}) \right]$$

$$J_{os}(\omega_j; T_{je}) = \text{Re} \left[ \frac{1 + \frac{1}{4} \left( i\omega \tau_{GdH} + \frac{\tau_{GdH}}{T_{je}} \right)^{\frac{1}{2}}}{1 + \left( i\omega \tau_{GdH} + \frac{\tau_{GdH}}{T_{je}} \right)^{\frac{1}{2}} + \frac{4}{9} \left( i\omega \tau_{GdH} + \frac{\tau_{GdH}}{T_{je}} \right) + \frac{1}{9} \left( i\omega \tau_{GdH} + \frac{\tau_{GdH}}{T_{je}} \right)^{\frac{3}{2}}} \right]; \quad j=1,2$$

The diffusion coefficient,  $D_{GdH}$ , is assumed to follow an Arrhenius law, with an activation energy  $E_{GdH}$ , and with  $D_{GdH}^{298}$  as the diffusion coefficient at 298.15 K.

$$D_{GdH} = D_{GdH}^{298} \exp \left\{ \frac{E_{GdH}}{R} \left( \frac{1}{298.15} - \frac{1}{T} \right) \right\}$$

## Tables:

Table S1. Variable temperature reduced transverse and longitudinal  $^{17}\text{O}$  relaxation rates and chemical shifts of  $[\text{GdL}^1(\text{H}_2\text{O})_3]^{3+}$  solution at 9.4T.

Table S2. Proton relaxivities ( $r_1$ ;  $\text{mM}^{-1}\text{s}^{-1}$ ) of  $[\text{GdL}^1(\text{H}_2\text{O})_3]^{3+}$  solution

Table S3. The transverse electronic relaxation rates of  $[\text{GdL}^1(\text{H}_2\text{O})_3]^{3+}$  at variable temperature and field.

Table S4. Variable temperature reduced transverse and longitudinal  $^{17}\text{O}$  relaxation rates and chemical shifts of  $[\text{GdL}^2(\text{H}_2\text{O})_3]^{3+}$  solution at a) 9.4 T and b) 14.1 T.

Table S5. Variable pressure reduced transverse  $^{17}\text{O}$  relaxation rates of  $[\text{GdL}^2(\text{H}_2\text{O})_3]^{3+}$  solution at 298 K at 9.4 T.

Table S6. Proton relaxivities ( $r_1$ ;  $\text{mM}^{-1}\text{s}^{-1}$ ) of  $[\text{GdL}^2(\text{H}_2\text{O})_3]^{3+}$  solution.

Table S7. The transverse electronic relaxation rates of  $[\text{GdL}^2(\text{H}_2\text{O})_3]^{3+}$  at variable temperature and field.

## Figures:

Fig. S1. a)  $[\text{GdL}^1(\text{H}_2\text{O})_3]^{3+}$  temperature dependence of reduced transverse  $1/T_{2r}$  ( $\circ$ ), longitudinal  $1/T_{1r}$  ( $\square$ )  $^{17}\text{O}$  relaxation rates and chemical shifts  $\Delta\omega_r$  ( $\triangle$ ) measured at 9.4 T.

b)  $[\text{GdL}^1(\text{H}_2\text{O})_3]^{3+}$  temperature dependence of EPR linewidths at 9.4 GHz ( $\circ$ ), 35 GHz ( $\triangle$ ), 75 GHz ( $\diamond$ ) and 225 GHz ( $\square$ ).

c)  $[\text{GdL}^1(\text{H}_2\text{O})_3]^{3+}$   $^1\text{H}$  NMRD profiles at 15°C ( $\square$ ), 25°C ( $\circ$ ), 50°C ( $\triangle$ ) and 63°C ( $\diamond$ ).

The lines represent results from the combined data analysis.

Fig. S2.  $^1\text{H}$  NMR spectra of  $[\text{EuL}^2(\text{H}_2\text{O})_3]^{3+}$  in  $\text{D}_2\text{O}$  at different temperatures.

Fig. S3.  $^1\text{H}$  NMR spectra of  $[\text{EuL}^2(\text{H}_2\text{O})_3]^{3+}$  in  $\text{D}_2\text{O}$  at different pDs.

Fig. S4. For  $[\text{Gd}(\text{DOTA})(\text{H}_2\text{O})]^-$ : temperature dependence of reduced  $^{17}\text{O}$  transverse (a), longitudinal relaxation rates (b) and reduced chemical shifts (c) at 9.4 T, 4.7 T and 1.4 T. Temperature dependence of the EPR peak-to-peak line widths (d) and the apparent g-factor (e) at 9.4 GHz, 75 GHz, 150 GHz and 225 GHz. NMRD profiles (f) at 277.2 K, 283.2 K, 291.2 K, 298.2 K, 305.2 K and 312.2 K.

Fig. S5. For  $[\text{Gd}(\text{DTPA})(\text{H}_2\text{O})]^{2-}$ : temperature dependence of reduced  $^{17}\text{O}$  transverse (a), longitudinal relaxation rates (b) and reduced chemical shifts (c) at 9.4 T, 4.7 T and 1.4 T. Temperature dependence of the EPR peak-to-peak line widths (d) at 9.4 GHz, 35 GHz and 125 GHz. NMRD profiles (e) at 278.2 K, 298.2 K and 308.2 K.



Table 1. Variable temperature reduced transverse and longitudinal  $^{17}\text{O}$  relaxation rates and chemical shifts of  $[\text{GdL}^1(\text{H}_2\text{O})_3]^{3+}$  solution at 9.4T. ( $c=0.0127 \text{ mol kg}^{-1}$ ,  $\text{pH}=3.0$ )

| T/K   | 1000/T | $P_m$    | $T_{1r}/s(\text{H}_2\text{O})$ | $T_{1r}/s$ | $\ln(1/T_{1r})$ | $T_{2r}/s(\text{H}_2\text{O})$ | $T_{2r}/s$ | $\ln(1/T_{2r})$ | $\nu_{\text{ref}}/\text{Hz}$ | $\nu_{\text{sample}}/\text{Hz}$ | $\Delta\omega_r/\text{rad s}^{-1}$ |
|-------|--------|----------|--------------------------------|------------|-----------------|--------------------------------|------------|-----------------|------------------------------|---------------------------------|------------------------------------|
| 299.2 | 3.34   | 6.86E-04 | 7.31E-03                       | 6.70E-03   | 9.80            | 7.42E-03                       | 9.42E-04   | 14.12           | -396.6                       | -412.5                          | -1.46E+05                          |
| 312.2 | 3.20   | 6.86E-04 | 9.68E-03                       | 8.76E-03   | 9.67            | 9.75E-03                       | 7.77E-04   | 14.36           | -423.1                       | -455.0                          | -2.92E+05                          |
| 336.2 | 2.97   | 6.86E-04 | 1.51E-02                       | 1.37E-02   | 9.17            | 1.58E-02                       | 7.89E-04   | 14.38           | -486.8                       | -545.0                          | -5.33E+05                          |
| 299.3 | 3.34   | 6.86E-04 | 7.31E-03                       | 6.66E-03   | 9.87            | 7.42E-03                       | 9.31E-04   | 14.13           | -396.6                       | -412.5                          | -1.46E+05                          |
| 288.2 | 3.47   | 6.86E-04 | 5.53E-03                       | 5.14E-03   | 9.91            | 5.60E-03                       | 1.21E-03   | 13.76           | -375.6                       | -383.8                          | -7.73E+04                          |
| 276.8 | 3.61   | 6.86E-04 | 3.97E-03                       | 3.64E-03   | 10.4            | 3.91E-03                       | 1.56E-03   | 13.24           | -338.2                       | -343.5                          | -4.85E+04                          |
| 323.5 | 3.09   | 6.86E-04 | 1.22E-02                       | 1.12E-02   | 9.25            | 1.27E-02                       | 7.30E-04   | 14.45           | -449.7                       | -502.7                          | -4.86E+05                          |
| 347.9 | 2.87   | 6.86E-04 | 1.81E-02                       | 1.71E-02   | 8.51            | 1.86E-02                       | 9.18E-04   | 14.23           | -505.23                      | -576.7                          | -6.54E+05                          |
| 299.3 | 3.34   | 6.86E-04 | 7.31E-03                       | 6.70E-03   | 9.82            | 7.40E-03                       | 9.56E-04   | 14.10           | -390.9                       | -401.5                          | -9.70E+04                          |
| 359.7 | 2.78   | 6.86E-04 | 2.17E-02                       | 2.03E-02   | 8.43            | 2.23E-02                       | 1.08E-03   | 14.07           | -544.6                       | -616.0                          | -6.54E+05                          |

Table 2. Proton relaxivities ( $r_1$ ;  $\text{mM}^{-1}\text{s}^{-1}$ ) of  $[\text{GdL}^1(\text{H}_2\text{O})_3]^{3+}$  solution

| $\nu$ /MHz | B / T     | 15 °C | 25 °C | 37 °C | 50 °C | 63 °C | 75 °C |
|------------|-----------|-------|-------|-------|-------|-------|-------|
| 20.00      | 0.470     | 12.60 | 9.79  | 7.95  | 6.02  | 5.53  | 4.85  |
| 16.00      | 0.376     | 12.81 | 10.09 | 8.19  | 6.23  | 5.61  | 4.92  |
| 12.00      | 0.282     | 13.09 | 10.60 | 8.61  | 7.18  | 6.26  | 5.54  |
| 9.998      | 0.235     | 13.29 | 11.18 | 8.98  | 7.84  | 6.41  | 5.77  |
| 5.999      | 0.141     | 14.42 | 12.89 | 10.99 | 9.30  | 7.95  | 7.11  |
| 3.598      | 0.08456   | 15.71 | 15.45 | 12.68 | 11.08 | 9.20  | 8.06  |
| 2.159      | 0.05074   | 17.15 | 16.55 | 14.09 | 12.12 | 10.15 | 8.97  |
| 1.296      | 0.03046   | 18.50 | 18.19 | 15.42 | 12.54 | 10.58 | 9.26  |
| 0.7781     | 0.01829   | 19.24 | 18.37 | 15.74 | 13.08 | 10.93 | 9.68  |
| 0.4669     | 0.01097   | 20.07 | 18.46 | 15.84 | 13.29 | 10.85 | 9.53  |
| 0.2800     | 0.006580  | 20.08 | 18.68 | 16.17 | 13.19 | 11.29 | 9.58  |
| 0.1680     | 0.003948  | 19.28 | 18.37 | 15.83 | 12.97 | 10.95 | 9.62  |
| 0.1008     | 0.002369  | 19.96 | 18.44 | 16.10 | 12.99 | 10.93 | 9.63  |
| 0.0605     | 0.001422  | 19.88 | 18.72 | 16.08 | 12.92 | 11.08 | 9.73  |
| 0.0362     | 0.0008507 | 19.21 | 18.59 | 15.78 | 13.01 | 11.18 | 9.73  |
| 0.0217     | 0.0005099 | 19.70 | 18.69 | 15.95 | 13.20 | 11.24 | 9.87  |

Table 3. The transverse electronic relaxation rates of  $[\text{GdL}^1(\text{H}_2\text{O})_3]^{3+}$  at variable temperature and field. ( $c=0.008 \text{ mol kg}^{-1}$ )

| B/T  | T/K    | 1000/T | W/Gauss | $\Delta H_{pp}$ /Gauss | $1/T_{2e}$ | $\ln(1/T_{2e})$ |
|------|--------|--------|---------|------------------------|------------|-----------------|
| 0.34 | 277.00 | 3.61   | 204.40  | 236.0                  | 3.75E+09   | 22.04           |
| 0.34 | 298.00 | 3.36   | 207.80  | 239.9                  | 3.81E+09   | 22.06           |
| 0.34 | 316.00 | 3.16   | 193.10  | 223.0                  | 3.54E+09   | 21.99           |
| 0.34 | 336.00 | 2.98   | 178.40  | 206.0                  | 3.27E+09   | 21.91           |
| 0.34 | 358.00 | 2.79   | 170.61  | 197.0                  | 3.13E+09   | 21.86           |
| 1.28 | 277.00 | 3.61   | 51.44   | 59.4                   | 9.43E+08   | 20.66           |
| 1.28 | 298.00 | 3.36   | 67.44   | 77.9                   | 1.24E+09   | 20.94           |
| 1.28 | 316.00 | 3.16   | 70.02   | 80.9                   | 1.28E+09   | 20.97           |
| 1.28 | 336.00 | 2.98   | 76.45   | 88.3                   | 1.40E+09   | 21.06           |
| 1.28 | 358.00 | 2.79   | 80.85   | 93.4                   | 1.48E+09   | 21.12           |
| 2.71 | 277.00 | 3.61   | 22.06   | 25.5                   | 4.04E+08   | 19.82           |
| 2.71 | 298.00 | 3.36   | 25.02   | 28.9                   | 4.59E+08   | 19.94           |
| 2.71 | 316.00 | 3.16   | 31.02   | 35.8                   | 5.69E+08   | 20.16           |
| 2.71 | 336.00 | 2.98   | 34.43   | 39.8                   | 6.31E+08   | 20.26           |
| 2.71 | 358.00 | 2.79   | 39.65   | 45.8                   | 7.27E+08   | 20.40           |
| 8.12 | 277.00 | 3.61   | 10.25   | 11.8                   | 1.88E+08   | 19.05           |
| 8.12 | 298.00 | 3.36   | 11.11   | 12.8                   | 2.04E+08   | 19.13           |
| 8.12 | 316.00 | 3.16   | 12.88   | 14.9                   | 2.36E+08   | 19.28           |
| 8.12 | 336.00 | 2.98   | 14.11   | 16.3                   | 2.59E+08   | 19.37           |
| 8.12 | 358.00 | 2.79   | 15.83   | 18.3                   | 2.90E+08   | 19.49           |



Table 4a. Variable temperature reduced transverse and longitudinal  $^{17}\text{O}$  relaxation rates and chemical shifts of  $[\text{GdL}^2(\text{H}_2\text{O})_3]^{3+}$  solution at 9.4 T. ( $c=0.010 \text{ mol kg}^{-1}$ ,  $\text{pH}=2.5$ )

| T/K    | 1000/T | $P_m$    | $T_1/\text{s}(\text{H}_2\text{O})$ | $T_1/\text{s}$ | $\ln(1/T_{1r})$ | $T_2/\text{s}(\text{H}_2\text{O})$ | $T_2/\text{s}$ | $\ln(1/T_{2r})$ | $\nu_{\text{ref}}/\text{Hz}$ | $\nu_{\text{sample}}/\text{Hz}$ | $\Delta\omega_r/\text{rad s}^{-1}$ |
|--------|--------|----------|------------------------------------|----------------|-----------------|------------------------------------|----------------|-----------------|------------------------------|---------------------------------|------------------------------------|
| 299.20 | 3.34   | 5.40E-04 | 7.31E-03                           | 6.59E-03       | 10.2            | 7.42E-03                           | 1.88E-03       | 13.51           | -396.6                       | -412.5                          | -1.85E+05                          |
| 312.15 | 3.20   | 5.40E-04 | 9.68E-03                           | 8.91E-03       | 9.71            | 9.75E-03                           | 1.46E-03       | 13.89           | -423.1                       | -444.35                         | -2.47E+05                          |
| 336.15 | 2.97   | 5.40E-04 | 1.51E-02                           | 1.37E-02       | 9.41            | 1.58E-02                           | 1.04E-03       | 14.33           | -486.8                       | -523.0                          | -4.21E+05                          |
| 299.30 | 3.34   | 5.40E-04 | 7.31E-03                           | 6.69E-03       | 10.1            | 7.42E-03                           | 1.85E-03       | 13.53           | -396.6                       | -407.2                          | -1.23E+05                          |
| 288.15 | 3.47   | 5.40E-04 | 5.53E-03                           | 5.11E-03       | 10.2            | 5.60E-03                           | 2.33E-03       | 13.05           | -375.3                       | -386.0                          | -1.24E+05                          |
| 275.75 | 3.63   | 5.40E-04 | 3.97E-03                           | 3.75E-03       | 10.2            | 3.91E-03                           | 2.45E-03       | 12.55           | -338.2                       | -343.5                          | -6.17E+04                          |
| 323.45 | 3.09   | 5.40E-04 | 1.22E-02                           | 1.11E-02       | 9.59            | 1.27E-02                           | 1.19E-03       | 14.16           | -449.6                       | -476.0                          | -3.06E+05                          |
| 347.85 | 2.87   | 5.40E-04 | 1.81E-02                           | 1.70E-02       | 8.78            | 1.86E-02                           | 1.07E-03       | 14.31           | -505.2                       | -551.7                          | -5.40E+05                          |
| 299.30 | 3.34   | 5.40E-04 | 7.31E-03                           | 6.76E-03       | 9.94            | 7.40E-03                           | 1.93E-03       | 13.47           | -390.9                       | -406.9                          | -1.86E+05                          |
| 359.65 | 2.78   | 5.40E-04 | 2.17E-02                           | 2.02E-02       | 8.72            | 2.23E-02                           | 1.12E-03       | 14.26           | -544.5                       | -601.4                          | -6.61E+05                          |

Table 4b. Variable temperature reduced transverse and longitudinal  $^{17}\text{O}$  relaxation rates and chemical shifts of  $[\text{GdL}^2(\text{H}_2\text{O})_3]^{3+}$  solution at 14.1 T. ( $c=0.0074 \text{ mol kg}^{-1}$ ,  $\text{pH}=2.6$ )

| T/K   | 1000/T | $P_m$    | $T_1/\text{s}(\text{H}_2\text{O})$ | $T_1/\text{s}$ | $\ln(1/T_{1r})$ | $T_2/\text{s}(\text{H}_2\text{O})$ | $T_2/\text{s}$ | $\ln(1/T_{2r})$ | $\nu_{\text{ref}}/\text{Hz}$ | $\nu_{\text{sample}}/\text{Hz}$ | $\Delta\omega_r/\text{rad s}^{-1}$ |
|-------|--------|----------|------------------------------------|----------------|-----------------|------------------------------------|----------------|-----------------|------------------------------|---------------------------------|------------------------------------|
| 298.0 | 3.36   | 4.00E-04 | 7.14E-03                           | 6.71E-03       | 10.0            | 7.10E-03                           | 2.40E-03       | 13.44           | -2066.5                      | -2075.5                         | -1.41E+05                          |
| 322.1 | 3.11   | 4.00E-04 | 1.26E-02                           | 1.19E-02       | 9.39            | 1.24E-02                           | 1.42E-03       | 14.26           | -2162.9                      | -2183.7                         | -3.26E+05                          |
| 286.3 | 3.49   | 4.00E-04 | 5.08E-03                           | 4.73E-03       | 10.5            | 5.07E-03                           | 2.79E-03       | 12.91           | -2021.5                      | -2029.9                         | -1.33E+05                          |
| 276.0 | 3.62   | 4.00E-04 | 3.66E-03                           | 3.43E-03       | 10.7            | 3.77E-03                           | 2.62E-03       | 12.59           | -1986.2                      | -1993.0                         | -1.07E+05                          |
| 347.8 | 2.88   | 4.00E-04 | 1.98E-02                           | 1.86E-02       | 9.01            | 1.95E-02                           | 1.23E-03       | 14.46           | -2263.3                      | -2307.6                         | -6.97E+05                          |
| 310.3 | 3.22   | 4.00E-04 | 9.61E-03                           | 9.04E-03       | 9.71            | 9.46E-03                           | 1.80E-03       | 13.93           | -2112.6                      | -2123.3                         | -1.67E+05                          |
| 368.7 | 2.71   | 4.00E-04 | 2.55E-02                           | 2.42E-02       | 8.60            | 2.52E-02                           | 1.53E-03       | 14.24           | -2331.5                      | -2389.0                         | -9.04E+05                          |
| 357.8 | 2.80   | 4.00E-04 | 2.21E-02                           | 2.10E-02       | 8.73            | 2.18E-02                           | 1.31E-03       | 14.40           | -2290.1                      | -2343.0                         | -8.31E+05                          |
| 335.8 | 2.98   | 4.00E-04 | 1.61E-02                           | 1.52E-02       | 9.13            | 1.60E-02                           | 1.23E-03       | 14.45           | -2211.8                      | -2246.0                         | -5.37E+05                          |

Table 5. Variable pressure reduced transverse  $^{17}\text{O}$  relaxation rates of  $[\text{GdL}^2(\text{H}_2\text{O})_3]^{3+}$  solution at 298 K at 9.4 T ( $c=0.00778 \text{ mol kg}^{-1}$ ,  $\text{pH}=2.5$ )

| P/Mpa | $P_m$    | $T_2/s(\text{H}_2\text{O})$ | $T_2/s$  | $\ln(1/T_{2r})$ |
|-------|----------|-----------------------------|----------|-----------------|
| 0.1   | 4.20E-04 | 7.42E-03                    | 2.38E-03 | 13.43           |
| 24.5  | 4.20E-04 | 7.42E-03                    | 2.33E-03 | 13.46           |
| 50.0  | 4.20E-04 | 7.42E-03                    | 2.28E-03 | 13.49           |
| 100.3 | 4.20E-04 | 7.42E-03                    | 2.18E-03 | 13.55           |
| 148.0 | 4.20E-04 | 7.42E-03                    | 2.14E-03 | 13.58           |
| 193.0 | 4.20E-04 | 7.42E-03                    | 2.08E-03 | 13.62           |
| 168.8 | 4.20E-04 | 7.42E-03                    | 2.13E-03 | 13.59           |
| 125.0 | 4.20E-04 | 7.42E-03                    | 2.18E-03 | 13.56           |
| 75.9  | 4.20E-04 | 7.42E-03                    | 2.25E-03 | 13.51           |

Table 6. Proton relaxivities ( $r_1$ ;  $\text{mM}^{-1}\text{s}^{-1}$ ) of  $[\text{GdL}^2(\text{H}_2\text{O})_3]^{3+}$  solution.

| $\nu$ /MHz | B / T     | 15 °C | 25 °C | 37 °C | 50 °C | 63 °C | 75 °C |
|------------|-----------|-------|-------|-------|-------|-------|-------|
| 200.1      | 4.70      | 12.11 | 11.20 | 9.73  | 7.43  | 5.87  | 4.74  |
| 60.00      | 1.410     | 13.43 | 11.56 | 9.80  | 8.01  | 6.20  | 5.47  |
| 20.00      | 0.470     | 12.38 | 11.18 | 9.55  | 7.65  | 6.42  | 5.54  |
| 16.00      | 0.376     | 12.58 | 11.53 | 9.62  | 8.18  | 6.98  | 6.02  |
| 12.00      | 0.282     | 12.25 | 11.72 | 10.52 | 8.56  | 7.32  | 6.51  |
| 9.998      | 0.235     | 12.65 | 12.13 | 10.76 | 9.11  | 7.81  | 7.03  |
| 5.999      | 0.141     | 13.95 | 13.60 | 12.38 | 10.22 | 8.90  | 9.02  |
| 3.598      | 0.08456   | 14.76 | 15.50 | 13.20 | 12.30 | 10.66 | 9.89  |
| 2.159      | 0.05074   | 15.47 | 16.53 | 15.85 | 13.92 | 11.42 | 10.70 |
| 1.296      | 0.03046   | 16.81 | 17.48 | 16.81 | 14.62 | 11.97 | 10.96 |
| 0.7781     | 0.01829   | 16.96 | 17.56 | 17.23 | 14.74 | 12.49 | 11.30 |
| 0.4669     | 0.01097   | 16.79 | 17.89 | 17.27 | 14.84 | 12.88 | 11.39 |
| 0.28       | 0.006580  | 16.84 | 17.93 | 16.21 | 14.80 | 12.87 | 11.35 |
| 0.168      | 0.003948  | 16.57 | 17.91 | 17.01 | 15.04 | 12.37 | 11.49 |
| 0.1008     | 0.002369  | 16.95 | 18.07 | 16.43 | 15.18 | 12.50 | 11.39 |
| 0.0605     | 0.001422  | 16.51 | 18.13 | 16.96 | 15.28 | 12.23 | 11.64 |
| 0.0362     | 0.0008507 | 16.84 | 18.23 | 17.24 | 15.08 | 12.55 | 11.49 |
| 0.0217     | 0.0005099 | 16.81 | 18.09 | 17.53 | 15.36 | 12.58 | 11.35 |

Table 7. The transverse electronic relaxation rates of  $[\text{GdL}^2(\text{H}_2\text{O})_3]^{3+}$  at variable temperature and field.  
( $c=0.010 \text{ mol kg}^{-1}$ )

| B/T  | T/K    | 1000/T | W/Gauss | $\Delta H_{p/p}$ /Gauss | 1/T2e    | ln(1/T2e) |
|------|--------|--------|---------|-------------------------|----------|-----------|
| 0.34 | 277.00 | 3.61   | 256.30  | 295.9                   | 4.70E+09 | 22.27     |
| 0.34 | 298.00 | 3.36   | 245.10  | 283.0                   | 4.49E+09 | 22.23     |
| 0.34 | 316.00 | 3.16   | 233.80  | 270.0                   | 4.29E+09 | 22.18     |
| 0.34 | 336.00 | 2.98   | 219.10  | 253.0                   | 4.02E+09 | 22.11     |
| 0.34 | 358.00 | 2.79   | 200.00  | 230.9                   | 3.67E+09 | 22.02     |
| 1.28 | 277.00 | 3.61   | 48.32   | 55.8                    | 8.86E+08 | 20.60     |
| 1.28 | 298.00 | 3.36   | 62.38   | 72.0                    | 1.14E+09 | 20.86     |
| 1.28 | 316.00 | 3.16   | 81.93   | 94.6                    | 1.50E+09 | 21.13     |
| 1.28 | 336.00 | 2.98   | 85.14   | 98.3                    | 1.56E+09 | 21.17     |
| 1.28 | 358.00 | 2.79   | 92.50   | 106.8                   | 1.70E+09 | 21.25     |
| 2.71 | 277.00 | 3.61   | 20.17   | 23.3                    | 3.70E+08 | 19.73     |
| 2.71 | 298.00 | 3.36   | 25.53   | 29.5                    | 4.68E+08 | 19.96     |
| 2.71 | 316.00 | 3.16   | 27.84   | 32.1                    | 5.10E+08 | 20.05     |
| 2.71 | 336.00 | 2.98   | 35.91   | 41.5                    | 6.58E+08 | 20.31     |
| 2.71 | 358.00 | 2.79   | 36.07   | 41.7                    | 6.61E+08 | 20.31     |
| 8.12 | 277.00 | 3.61   | 8.69    | 10.0                    | 1.59E+08 | 18.89     |
| 8.12 | 298.00 | 3.36   | 11.09   | 12.8                    | 2.03E+08 | 19.13     |
| 8.12 | 316.00 | 3.16   | 11.48   | 13.3                    | 2.11E+08 | 19.17     |
| 8.12 | 336.00 | 2.98   | 13.32   | 15.4                    | 2.44E+08 | 19.31     |
| 8.12 | 358.00 | 2.79   | 14.23   | 16.4                    | 2.61E+08 | 19.38     |

Fig. S1. top)  $[\text{GdL}^1(\text{H}_2\text{O})_3]^{3+}$  temperature dependence of reduced transverse  $1/T_{2r}$  (○), longitudinal  $1/T_{1r}$  (□)  $^{17}\text{O}$  relaxation rates and chemical shifts  $\Delta\omega_r$  (△) measured at 9.4 T.  
middle)  $[\text{GdL}^1(\text{H}_2\text{O})_3]^{3+}$  temperature dependence of EPR linewidths at 9.4 GHz (○), 35 GHz (△), 75 GHz (◇) and 225 GHz (□).  
bottom)  $[\text{GdL}^1(\text{H}_2\text{O})_3]^{3+}$   $^1\text{H}$  NMRD profiles at 15°C (□), 25°C (○), 50°C (△) and 63°C (◇).  
The lines represent results from the combined data analysis.

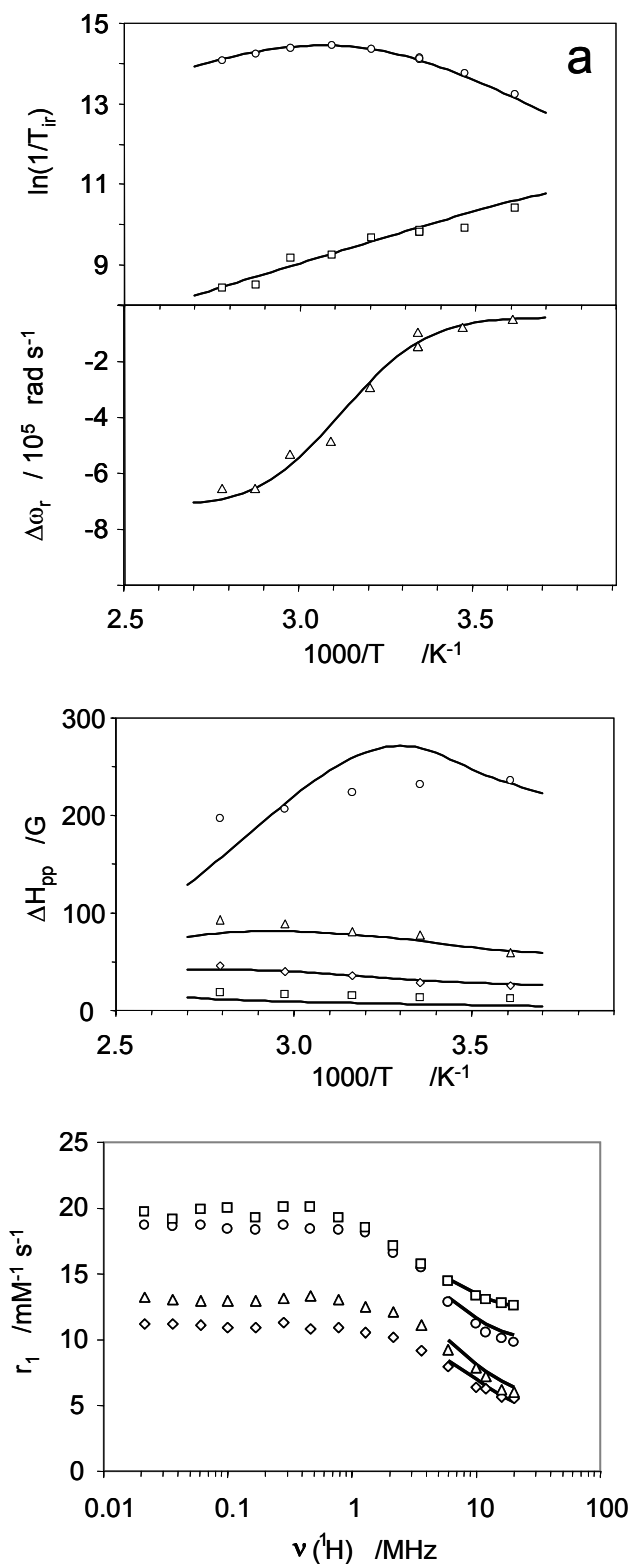

Fig. S2.  $^1\text{H}$  NMR spectra of  $[\text{EuL}^2(\text{H}_2\text{O})_3]^{3+}$  in  $\text{D}_2\text{O}$  at different temperatures.

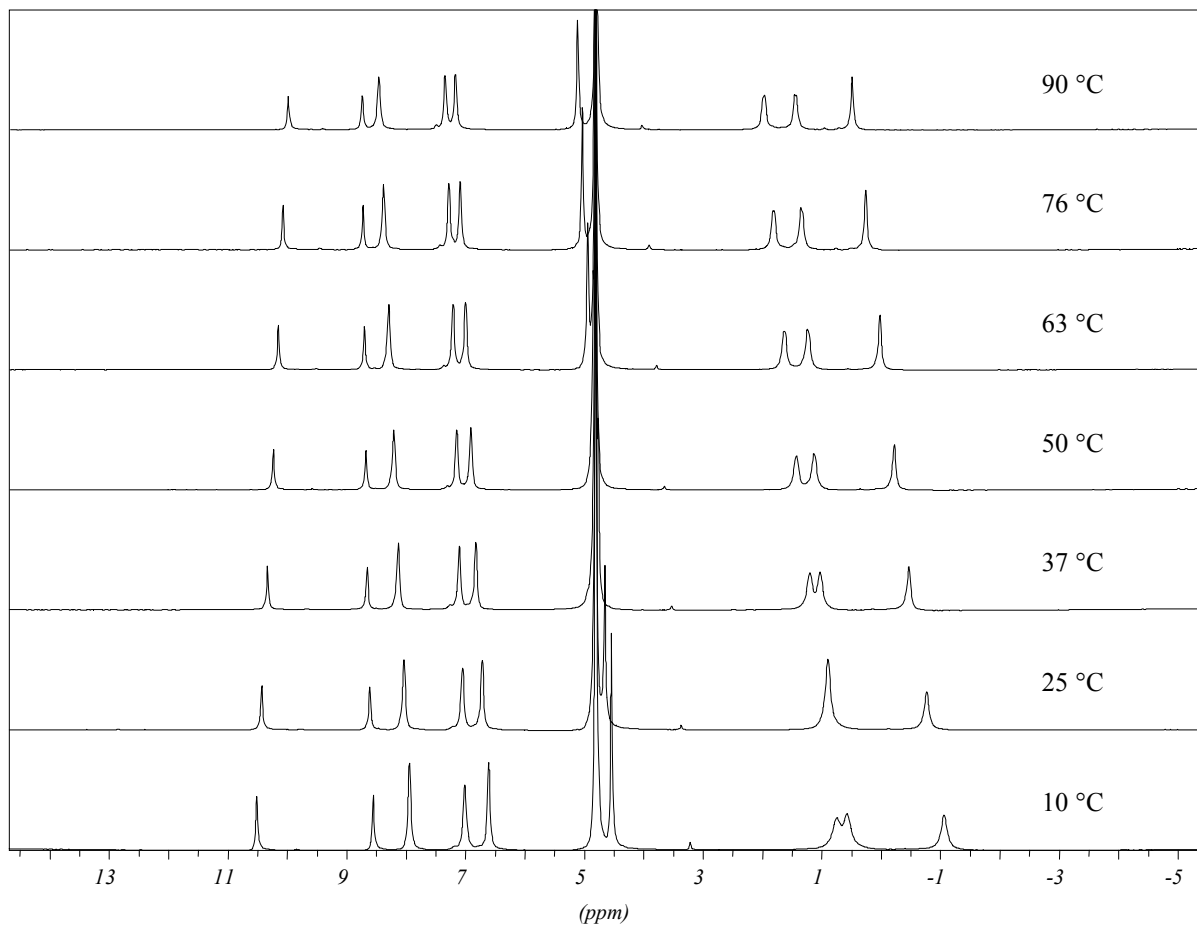

Fig. S3.  $^1\text{H}$  NMR spectra of  $[\text{EuL}^2(\text{H}_2\text{O})_3]^{3+}$  in  $\text{D}_2\text{O}$  at different pDs.

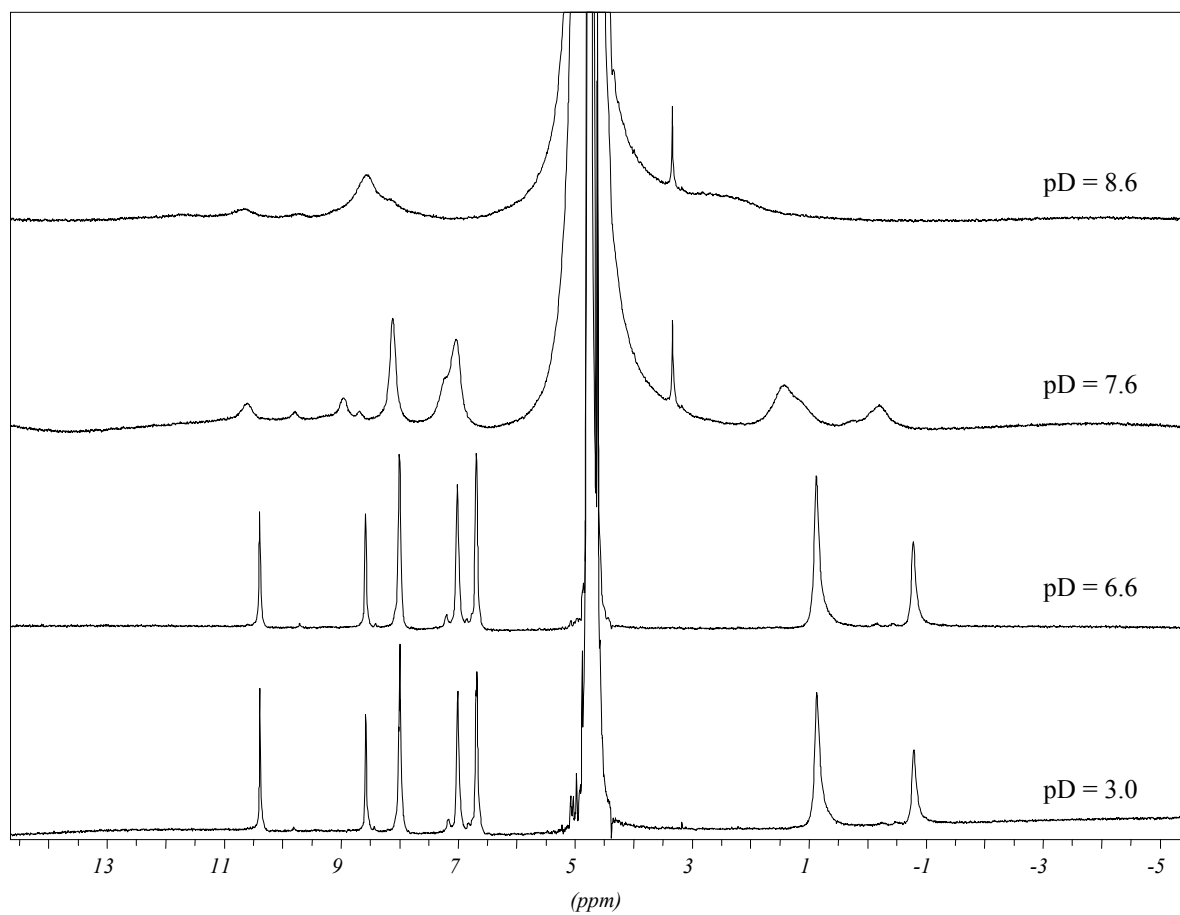

Fig. S4. For  $[\text{Gd}(\text{DOTA})(\text{H}_2\text{O})]^-$  temperature dependence of reduced  $^{17}\text{O}$  transverse (a), longitudinal relaxation rates (b) and reduced chemical shifts (c) at 9.4 T ( $\blacktriangledown$ ), 4.7 T ( $\blacksquare$ ) and 1.4 T ( $\bullet$ ). Temperature dependence of the EPR peak-to-peak line widths (d) and the apparent g-factor (e) at 9.4 GHz ( $\bullet$ ), 75 GHz ( $\blacksquare$ ), 150 GHz ( $\blacktriangledown$ ) and 225 GHz ( $\blacklozenge$ ). NMRD profiles (f) at 277.2 K ( $\blacksquare$ ), 283.2 K ( $\blacktriangledown$ ), 291.2 K ( $\blacklozenge$ ), 298.2 K ( $\bullet$ ), 305.2 K ( $*$ ) and 312.2 K ( $\blacktriangle$ ).

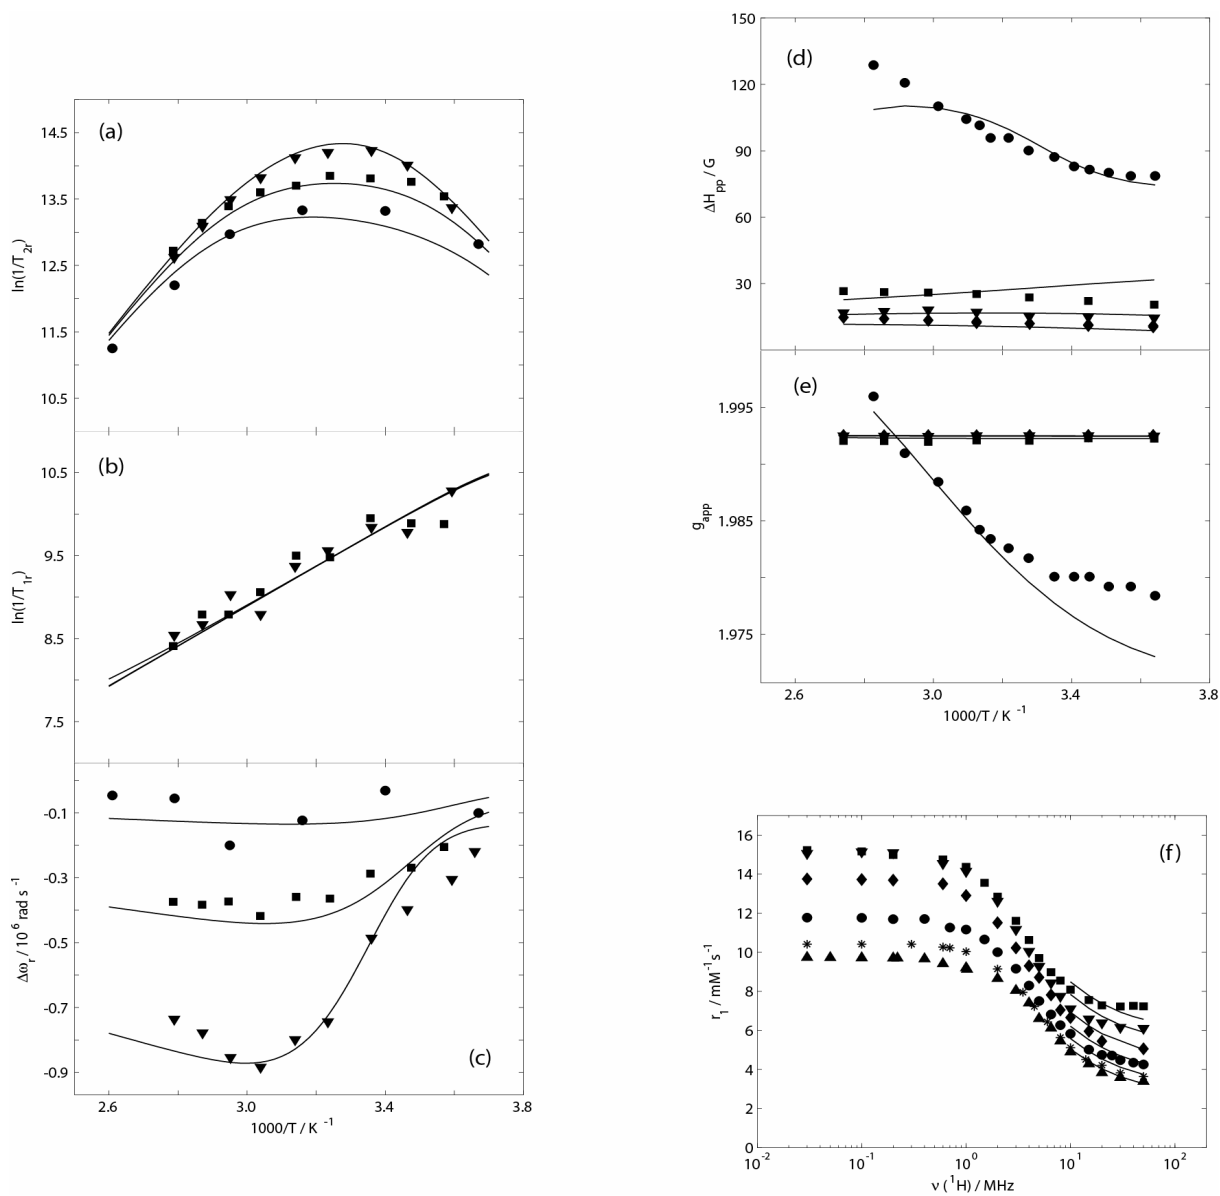

Fig. S5. For  $[\text{Gd}(\text{DTPA})(\text{H}_2\text{O})]^{2-}$  temperature dependence of reduced  $^{17}\text{O}$  transverse (a), longitudinal relaxation rates (b) and reduced chemical shifts (c) at 9.4 T ( $\blacktriangledown$ ), 4.7 T ( $\blacksquare$ ) and 1.4 T ( $\bullet$ ). Temperature dependence of the EPR peak-to-peak line widths (d) at 9.4 GHz ( $\bullet$ ), 35 GHz ( $\blacksquare$ ) and 125 GHz ( $\blacktriangledown$ ). NMRD profiles (e) at 278.2 K ( $\blacksquare$ ), 298.2 K ( $\blacktriangledown$ ) and 308.2 K ( $\blacklozenge$ ).

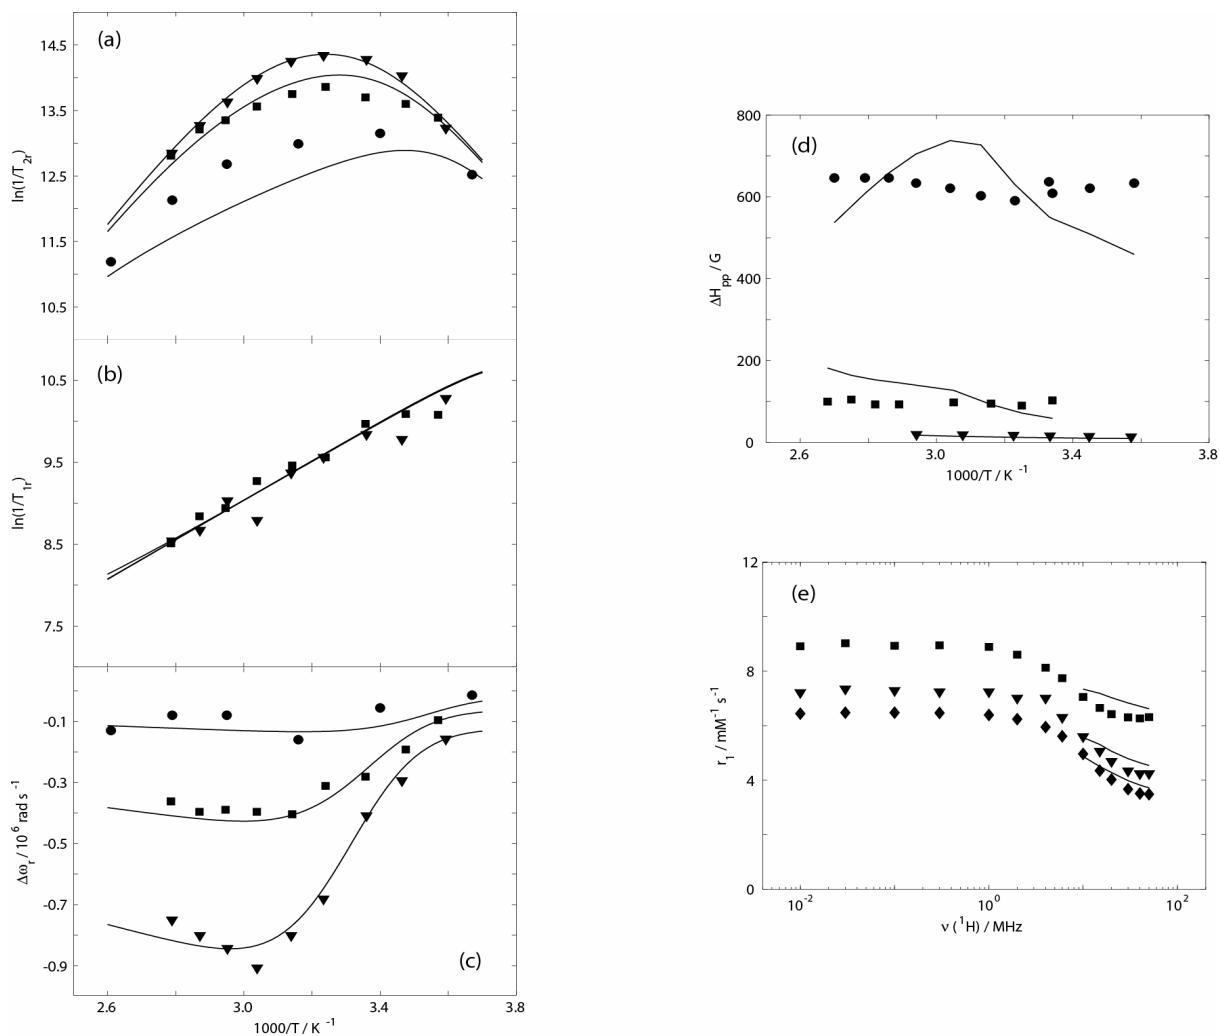

Supplement: b506700f.pdf [file b506700f.pdf]
